# Supplementary material for: Diversity and Antimicrobial Potential of Predatory Bacteria from the Peruvian Coastline
Source: PubMed Central journal article supplement (PMC5666416; doi:10.3390/md15100308), 2017-10-12
Supplement: marinedrugs-15-00308-s001.pdf [file marinedrugs-15-00308-s001.pdf]

## Supplementary Material

# Diversity and Antimicrobial Potential of Predatory Bacteria from the Peruvian Coastline

Luis Linares-Otoya,<sup>1,2,5</sup> Virginia Linares-Otoya,<sup>3,5</sup> Lizbeth Armas-Mantilla,<sup>3</sup> Cyntia Blanco-Olano,<sup>3</sup> Max Crüsemann,<sup>2</sup> Mayar L. Ganoza-Yupanqui,<sup>3</sup> Julio Campos-Florian,<sup>3</sup> Gabriele M. König,<sup>2,4</sup> Till F. Schäberle<sup>1,2,4,\*</sup>

<sup>1</sup> Institute for Insect Biotechnology, Justus Liebig University of Giessen, Giessen, Germany

<sup>2</sup> Institute for Pharmaceutical Biology, University of Bonn, Bonn, Germany

<sup>3</sup> Department of Pharmacology, Faculty of Pharmacy and Biochemistry, National University of Trujillo, Trujillo, Peru

<sup>4</sup> German Centre for Infection Research (DZIF) Partner Site Bonn/Cologne

<sup>5</sup> Research Centre for Sustainable Development Uku Pacha, Peru

\* Correspondence till.f.schaeberle@agrar.uni-giessen.de; Tel.: +49-641-9937140

**Supplementary Table S1.** Isolated strains that showed antibiotic activity

| Strain identifier | Strain name as deposited in NCBI database | Closest 16S rRNA gene sequence hit in BLAST      | Identity % | Isolation bait     | Isolation site |
|-------------------|-------------------------------------------|--------------------------------------------------|------------|--------------------|----------------|
| 2                 | Tenacibaculum sp. s2                      | Tenacibaculum sp. QDHT-02                        | 99         | <i>E. coli</i>     | Paracas        |
| 16                | Tenacibaculum sp. S16                     | Tenacibaculum sp. sw0106-03(3)                   | 99         | <i>E. coli</i>     | Paracas        |
| 17                | Kocuria rosea s17                         | Kocuria rosea                                    | 99         | <i>E. coli</i>     | Paracas        |
| 21                | Reichenbachiella sp. S21                  | Reichenbachiella agariperforans                  | 95         | <i>E. coli</i>     | Paracas        |
| 23                | Oceanicola marinus s23                    | Oceanicola marinus S15                           | 99         | <i>E. coli</i>     | Paracas        |
| 37                | Limibacter armeniacum s37                 | Limibacter armeniacum YM11-159                   | 99         | <i>E. coli</i>     | Paracas        |
| 42                | Fulvivirga sp. s42                        | Fulvivirga sp. ana H.e.                          | 99         | <i>P. inhibens</i> | Isla Foca      |
| 47                | Porifericola rodea s47                    | Porifericola rhodea                              | 99         | <i>P. inhibens</i> | Paracas        |
| 48                | Fulvivirga kasyanovii s48                 | Fulvivirga kasyanovii                            | 99         | <i>P. inhibens</i> | Isla Foca      |
| 68                | Rapidithrix sp. s68                       | Rapidithrix sp. TISTR 1768                       | 99         | <i>P. inhibens</i> | Paracas        |
| 80                | Rapidithrix sp s80                        | Rapidithrix sp. TISTR 1768                       | 99         | <i>P. inhibens</i> | Paracas        |
| 82                | Labrenzia sp. strain s82                  | Labrenzia sp. strain 1334-392                    | 98         | <i>E. coli</i>     | Paracas        |
| 83                | Microbulbifer hydrolyticus s83            | Microbulbifer hydrolyticus strain DSM 11525      | 99         | <i>E. coli</i>     | Manglares      |
| 90                | Bacillus sp. s90                          | Bacillus thuringiensis serovar finitimus YBT-020 | 99         | <i>P. inhibens</i> | Paracas        |
| 93                | Labrenzia sp. s93                         | Labrenzia sp. R-66638                            | 99         | <i>E. coli</i>     | Isla Foca      |
| 100               | Nitratireductor sp. s100                  | Nitratireductor sp.                              | 99         | <i>E. coli</i>     | Manglares      |
| 106               | Staphylococcus succinus s106              | Staphylococcus succinus                          | 99         | <i>P. inhibens</i> | Paracas        |
| 107               | Microbulbifer sp. s107                    | Microbulbifer sp. CMC                            | 99         | <i>P. inhibens</i> | Manglares      |
| 108               | Euzebyella sp. s108                       | Euzebyella sp. CY01                              | 97         | <i>P. inhibens</i> | Manglares      |
| 120               | Streptomyces sp. s120                     | Streptomyces sp. NPA1                            | 99         | <i>E. coli</i>     | Manglares      |
| 122               | Nocardiopsis sp. s122                     | Nocardiopsis sp. 13-112                          | 99         | <i>E. coli</i>     | Manglares      |
| 123               | Nitratireductor sp. s123                  | Nitratireductor sp. OM-1                         | 99         | <i>E. coli</i>     | Isla Foca      |
| 102 <sup>a</sup>  | Microbacterium sp. s102a                  | Microbacterium sp. CC4P                          | 99         | <i>P. inhibens</i> | Paracas        |
| 102b              | Paenibacillus sp. s102b                   | Paenibacillus glucanolyticus strain 5162         | 99         | <i>P. inhibens</i> | Paracas        |
| 118b              | Echinicola shivajiensis s118b             | Echinicola shivajiensis strain AK12              | 99         | <i>E. coli</i>     | Manglares      |
| 17_1c             | Planomicrobium sp. s171c                  | Planomicrobium sp. PK32_S1                       | 99         | <i>E. coli</i>     | Paracas        |
| 17_2c             | Paracoccus sp. s172c                      | Paracoccus sp. MAR824                            | 98         | <i>E. coli</i>     | Paracas        |
| 30b1              | Ponticoccus sp. s30b1                     | Ponticoccus sp. strain 7002-260                  | 100        | <i>E. coli</i>     | Paracas        |
| 49b1              | Bacillus aquimaris s49b1                  | Bacillus aquimaris strain M12                    | 99         | <i>E. coli</i>     | Paracas        |
| 49b2              | Euzebyella sp. s49b2                      | Euzebyella sp. B39                               | 99         | <i>E. coli</i>     | Paracas        |

**Supplementary Table S2.** Growth behavior at different NaCl concentrations

| Strain identifier | % NaCl |     |       |       |       |       |     |     |
|-------------------|--------|-----|-------|-------|-------|-------|-----|-----|
|                   | 0.5%   | 1%  | 1.95% | 2.14% | 2.23% | 3.89% | 5%  | 10% |
| 2                 | --     | ++  | +++   | +++   | ++    | ++    | --  | --  |
| 16                | --     | +   | ++    | +++   | ++    | +     | +   | --  |
| 17                | ++     | ++  | ++    | ++    | ++    | ++    | +   | --  |
| 17_1c             | ++     | ++  | ++    | ++    | ++    | ++    | +   | --  |
| 17_2c             | ++     | ++  | ++    | ++    | ++    | ++    | +   | --  |
| 21                | +      | +   | ++    | +++   | ++    | ++    | +   | +   |
| 23                | --     | --  | --    | +     | ++    | +++   | ++  | --  |
| 30b1              | ++     | +++ | +++   | ++++  | +++   | +++   | +++ | ++  |
| 37                | ++     | ++  | ++    | ++    | ++    | ++    | --  | --  |
| 42                | +      | ++  | +++   | +++   | ++    | +     | +   | +   |
| 47                | +      | ++  | +++   | ++    | ++    | ++    | --  | --  |
| 48                | +      | ++  | ++    | ++    | +     | --    | --  | --  |
| 49b1              | +++    | +++ | +++   | +++   | +++   | ++    | +   | --  |
| 49b2              | +      | +   | ++    | ++    | ++    | ++    | +   | --  |
| 68                | +      | ++  | +++   | +++   | ++    | +     | --  | --  |
| 80                | +      | ++  | +++   | +++   | ++    | +     | --  | --  |
| 82                | ++     | ++  | +++   | +++   | ++    | ++    | ++  | --  |
| 83                | +      | ++  | +++   | +++   | ++    | ++    | ++  | +   |
| 90                | +++    | +++ | +++   | +++   | +++   | +++   | ++  | --  |
| 93                | +      | ++  | ++    | ++    | +     | +     | --  | --  |
| 100               | ++     | ++  | ++    | ++    | ++    | ++    | ++  | -   |
| 102a              | +      | ++  | ++    | ++    | ++    | +     | +   | +   |
| 102b              | +      | ++  | +++   | +++   | ++    | +     | +   | +   |
| 106               | ++     | +++ | ++++  | +++   | +++   | +++   | ++  | ++  |
| 107               | +      | ++  | +++   | +++   | ++    | +     | +   | +   |
| 108               | +      | +   | ++    | +++   | ++    | +     | +   | --  |
| 118b              | --     | +   | ++    | ++    | +     | +     | +   | --  |
| 120               | ++     | ++  | ++    | ++    | ++    | ++    | --  | --  |
| 122               | +      | ++  | ++    | ++    | ++    | +     | +   | +   |
| 123               | ++     | +++ | +++   | ++    | ++    | ++    | +   | +   |

**Supplementary Table S3.** Growth behavior at different temperatures

| Strain identifier | 10°C |      | 27 °C |      | 30°C |      | 45°C |      |
|-------------------|------|------|-------|------|------|------|------|------|
|                   | 24 H | 48 H | 24 H  | 48 H | 24 H | 48 H | 24 H | 48 H |
| 2                 | --   | --   | ++    | +++  | ++   | +++  | --   | --   |
| 16                | --   | --   | ++    | +++  | ++   | +++  | --   | --   |
| 17                | --   | --   | ++    | ++   | ++   | ++   | --   | --   |
| 17_1c             | --   | --   | ++    | ++   | ++   | ++   | +    | +    |
| 17_2c             | --   | --   | ++    | ++   | ++   | ++   | --   | --   |
| 21                | --   | --   | ++    | +++  | ++   | +++  | --   | --   |
| 23                | --   | --   | ++    | +++  | ++   | +++  | --   | --   |
| 30b1              | --   | --   | +     | ++   | ++   | +++  | --   | --   |
| 37                | --   | --   | ++    | ++   | ++   | +++  | --   | --   |
| 42                | --   | --   | --    | +    | +    | ++   | --   | --   |
| 47                | --   | --   | --    | +    | ++   | +++  | +    | +    |
| 48                | --   | --   | --    | +    | +    | ++   | --   | --   |
| 49b1              | --   | --   | +     | ++   | +    | ++   | +    | +    |
| 49b2              | --   | --   | --    | ++   | ++   | +++  | --   | --   |
| 68                | --   | --   | --    | ++   | +    | ++   | --   | --   |
| 80                | --   | --   | +++   | +++  | +++  | +++  | --   | --   |
| 80                | --   | --   | --    | ++   | +    | ++   | --   | --   |
| 82                | --   | --   | ++    | +++  | ++   | +++  | +    | +    |
| 83                | --   | --   | +     | ++   | ++   | +++  | --   | +    |
| 90                | --   | --   | ++    | +++  | ++   | +++  | ++   | ++   |
| 93                | --   | --   | +     | ++   | +    | ++   | +    | +    |
| 100               | --   | --   | ++    | ++   | ++   | ++   | --   | --   |
| 102a              | --   | --   | +     | ++   | +    | ++   | +    | +    |
| 102b              | --   | --   | +     | ++   | +    | ++   | +    | +    |
| 106               | --   | --   | ++    | ++   | ++   | +++  | +++  | +++  |
| 107               | --   | --   | +     | ++   | ++   | +++  | +    | +    |
| 108               | --   | --   | ++    | +++  | +++  | +++  | --   | --   |
| 118b              | --   | --   | --    | +    | +    | ++   | +    | +    |
| 120               | --   | --   | ++    | +++  | +++  | +++  | ++   | +++  |
| 122               | --   | --   | +     | ++   | +    | ++   | +    | +    |
| 123               | --   | --   | +     | ++   | +    | ++   | +    | +    |

**Supplementary Table S4.** Selected predatory bacteria reported in the literature

| <b>Genus and or species</b>         | <b>Reference</b> |
|-------------------------------------|------------------|
| <i>Agromyces ramosus</i>            | [1]              |
| <i>Herpetosiphon</i>                | [2]              |
| <i>Bdellovibrio bacteriovorus</i>   | [3]              |
| <i>Halobacteriovorax</i>            | [4]              |
| <i>Myxococcus xanthus</i>           | [2]              |
| <i>Vampirococcus</i>                | [5]              |
| <i>Ensifer</i>                      | [6]              |
| <i>Cupriavidus necator</i>          | [7]              |
| <i>Lysobacter</i>                   | [8]              |
| <i>Saprospira grandis</i>           | [9]              |
| <i>Tenacibaculum</i>                | [10]             |
| <i>Olleya</i>                       | [10]             |
| <i>Cytophaga</i>                    | [11]             |
| <i>Rapidithrix</i>                  | [12]             |
| <i>Porifericola rhodea</i>          | [13]             |
| <i>Vampirovibrio chlorellavorus</i> | [2]              |
| <i>Micavibrio</i>                   | [14]             |

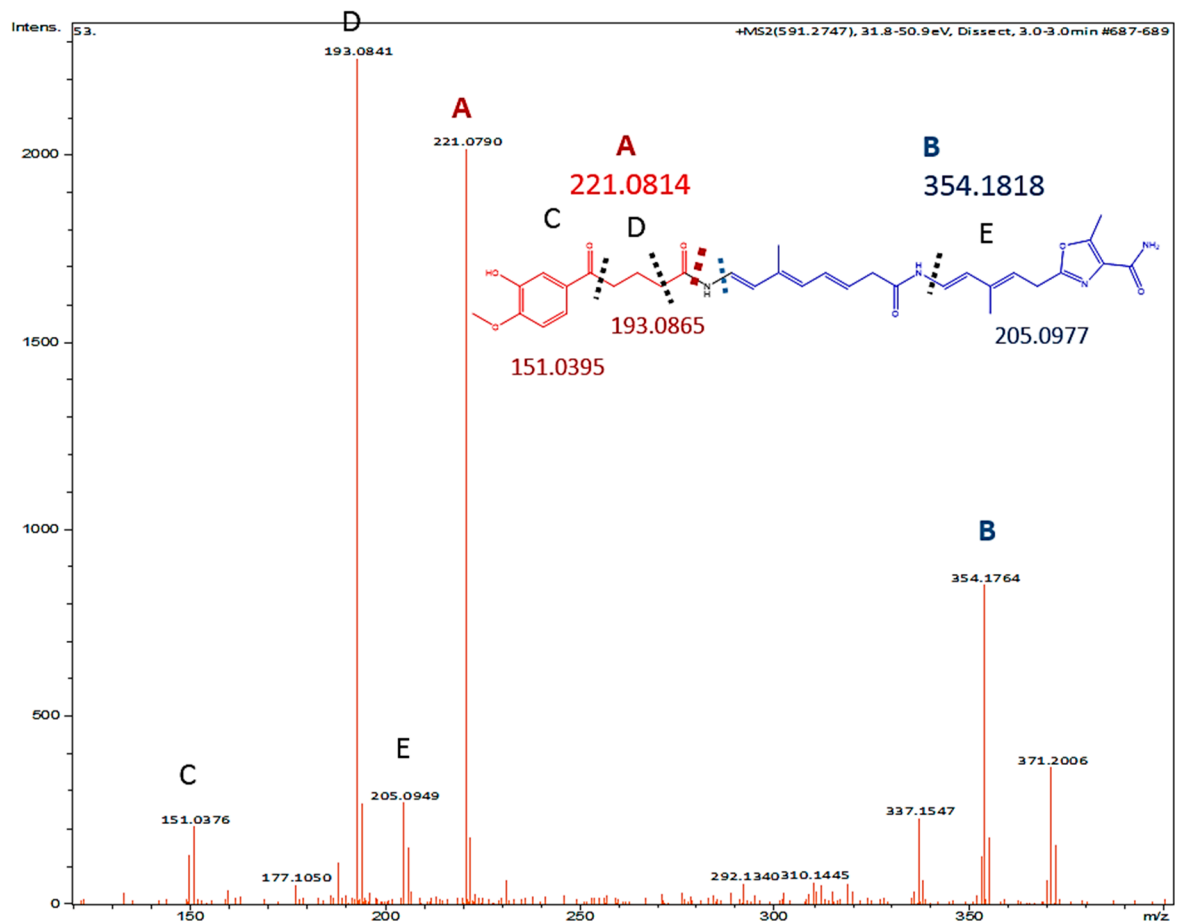

**Supplementary Figure S1.** MS/MS spectrum of *Rapidithrix thailandica* s80 crude extract showing the fragmentation pattern expected for ariakemicins isolated before from *Rapidithrix* sp [15].

**Supplementary Table S5.** Antismash bioinformatic of secondary metabolites BGC present in the genome of *Streptomyces sp. s120* showing the presence of the naphthyridinomycin and resistomycin BGC [16].

| Type                       | From | To    | Most similar known cluster                                                  | MIBiG BGC-ID  |
|----------------------------|------|-------|-----------------------------------------------------------------------------|---------------|
| Otherks-<br>T1pks-<br>Nrps | 1    | 58334 | Naphthyridinomycin_biosynthetic_gene_cluster (60% of genes show similarity) | BGC0000394_c1 |
| Other                      | 1    | 16023 | Naphthyridinomycin_biosynthetic_gene_cluster (39% of genes show similarity) | BGC0000394_c1 |
| T2pks                      | 422  | 42943 | Resistomycin_biosynthetic_gene_cluster (88% of genes show similarity)       | BGC0000264_c1 |

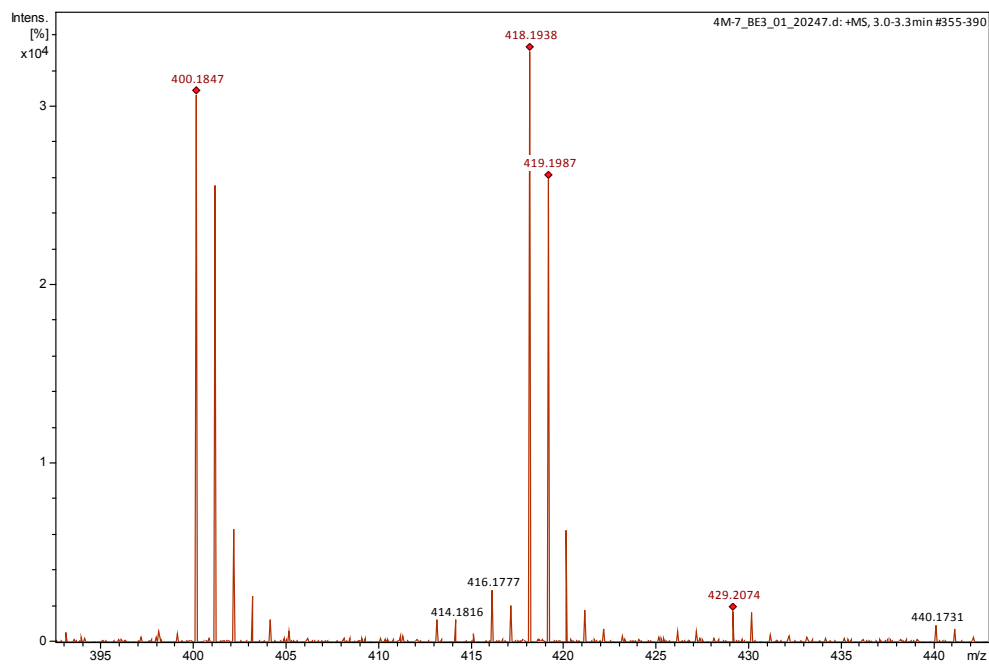

**Supplementary Figure S2.** MS spectrum of *Streptomyces sp.* s120 extract showing the presence of naphthyridinomycin (observed  $m/z$  418.1938, expected 418.1978) [17].

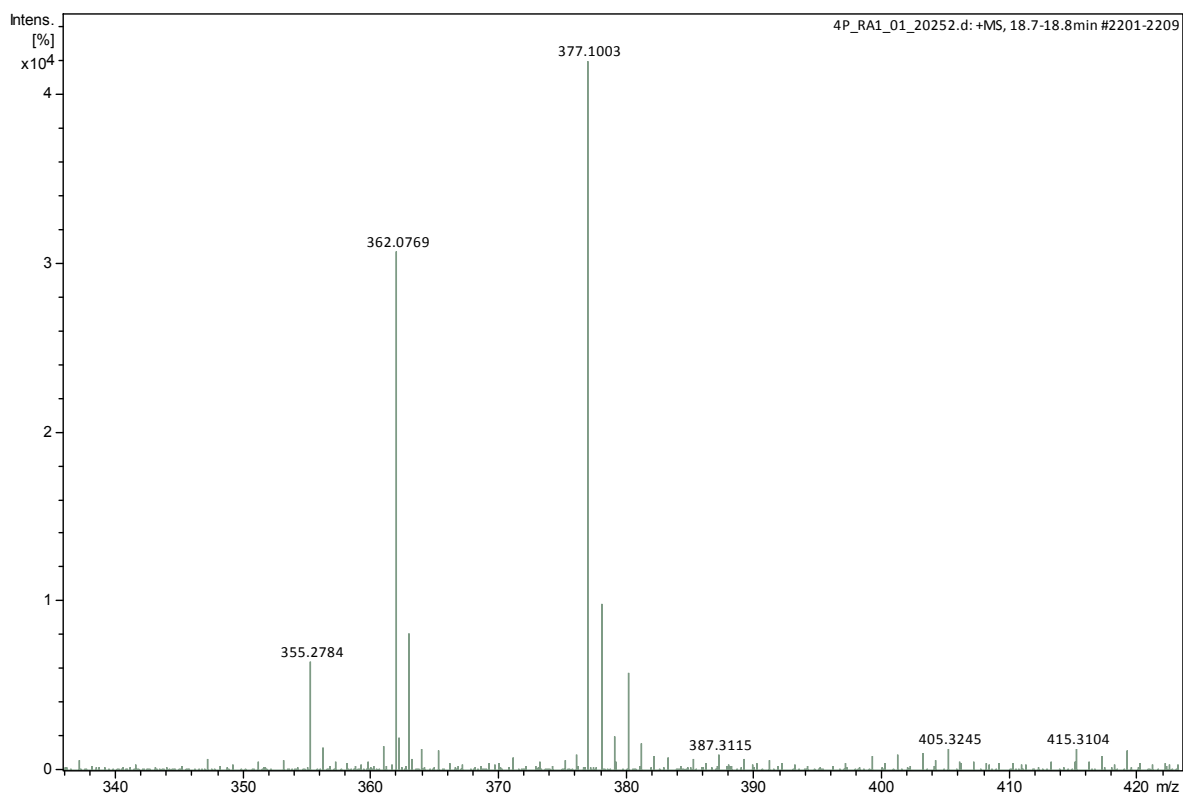

**Supplementary Figure S3.** MS spectrum of *Streptomyces sp.* s120 extract showing the presence of resistomycin (observed  $m/z$  377.1003, expected 377.1025) [18].



**Supplementary Table S6.** GNPS dereplication analysis of crude extract of *Paenibacillus sp. s102b* showing the presence of pumilacidin C and E as well as surfactin [19].

| Compound_Name                                           | Library Class | Cosine | Shared Peaks | TIC         | RT          | Mass Diff | SpecMZ  | LibMZ   | PI      |
|---------------------------------------------------------|---------------|--------|--------------|-------------|-------------|-----------|---------|---------|---------|
| pumilacidin_C_14344_der<br>eplictor_pv_2.93242e-26      | Bronze        | 0.82   | 36           | 6691.<br>19 | 419.<br>89  | 0.01      | 1078.75 | 1078.74 | Pevzner |
| pumilacidin_E_14342_der<br>eplictor_pv_1.13518e-25      | Bronze        | 0.65   | 25           | 4486.<br>22 | 402.<br>57  | 0.02      | 1064.73 | 1064.72 | Pevzner |
| [Ile2_4_7]Surfactin_43293_<br>dereplictor_pv_2.3158e-16 | Bronze        | 0.73   | 20           | 1797.<br>96 | 1152<br>.71 | 0.01      | 1022.68 | 1022.67 | Pevzner |

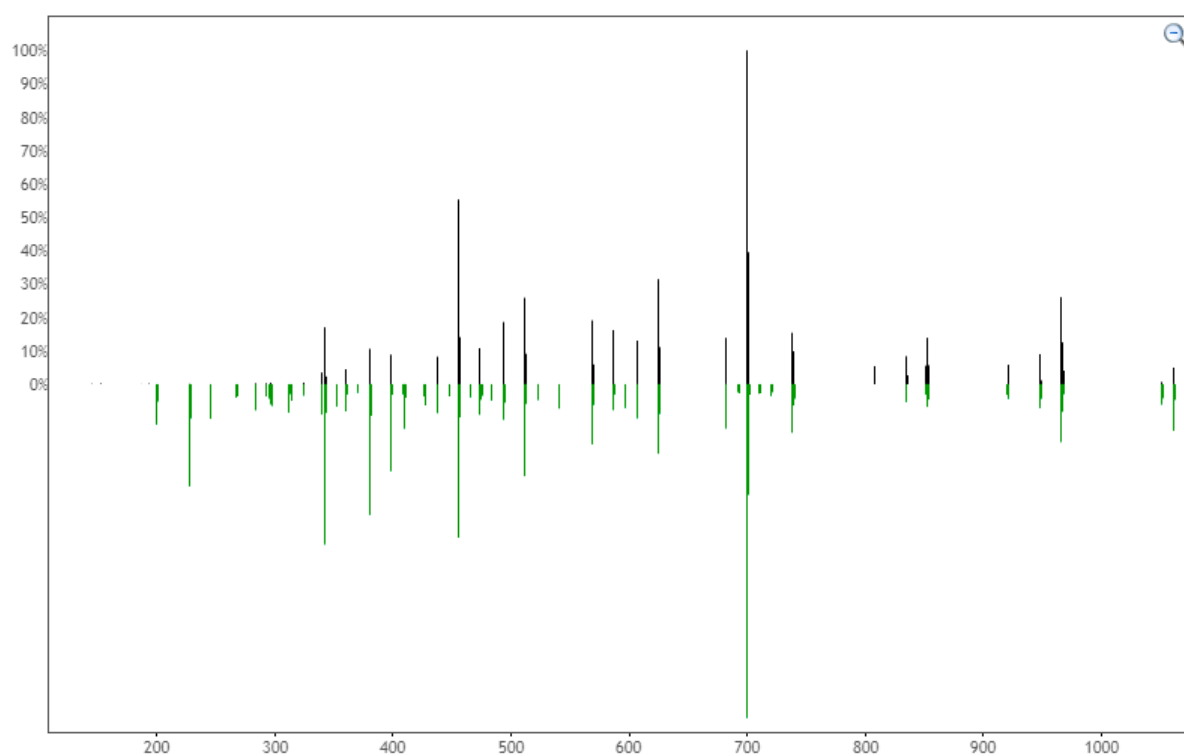

**Supplementary Figure S4.** MS/MS mirror plot of crude extract of *Paenibacillus sp. s102b* against GNPS database showing the presence of pumilacidin C [19]. Source: Green: Pumilacidin C MS/MS spectrum from GNPS database, black: Crude extract of *Paenibacillus sp. s102b*.

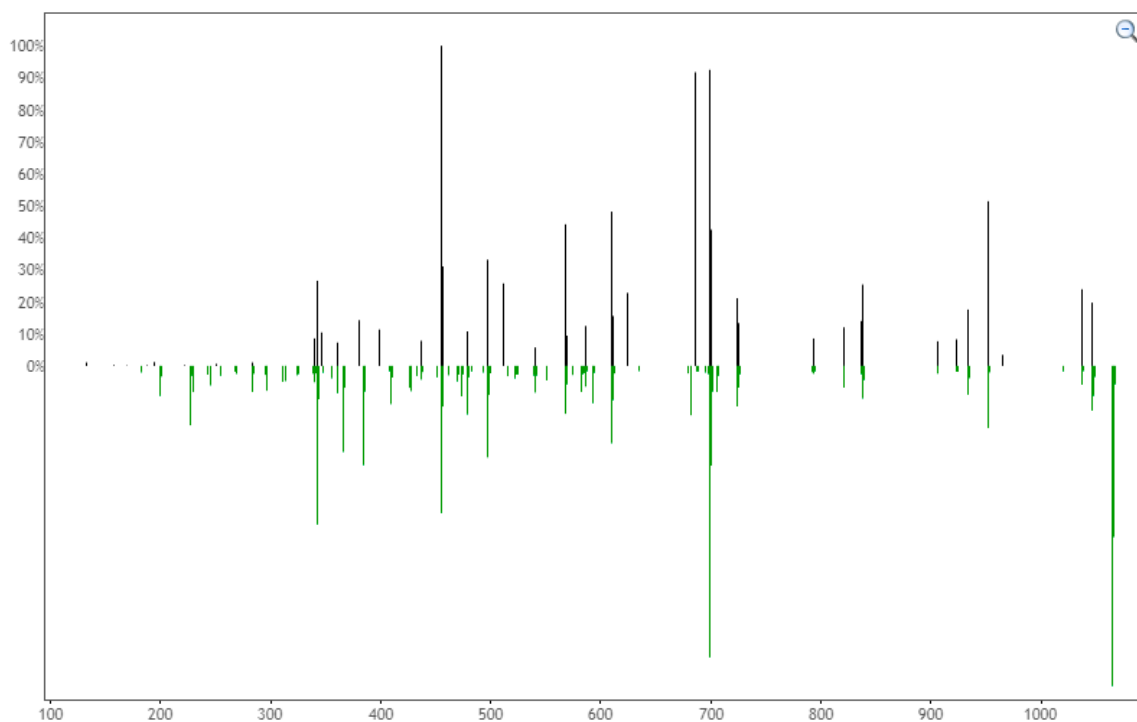

**Supplementary Figure S5.** MS/MS mirror plot of crude extract of *Paenibacillus sp.* s102b against GNPS database showing the presence of pumilacidin E [19]. Source: Green: Pumilacidin E MS/MS spectrum from GNPS database Black: Crude extract of *Paenibacillus sp.* s102b.

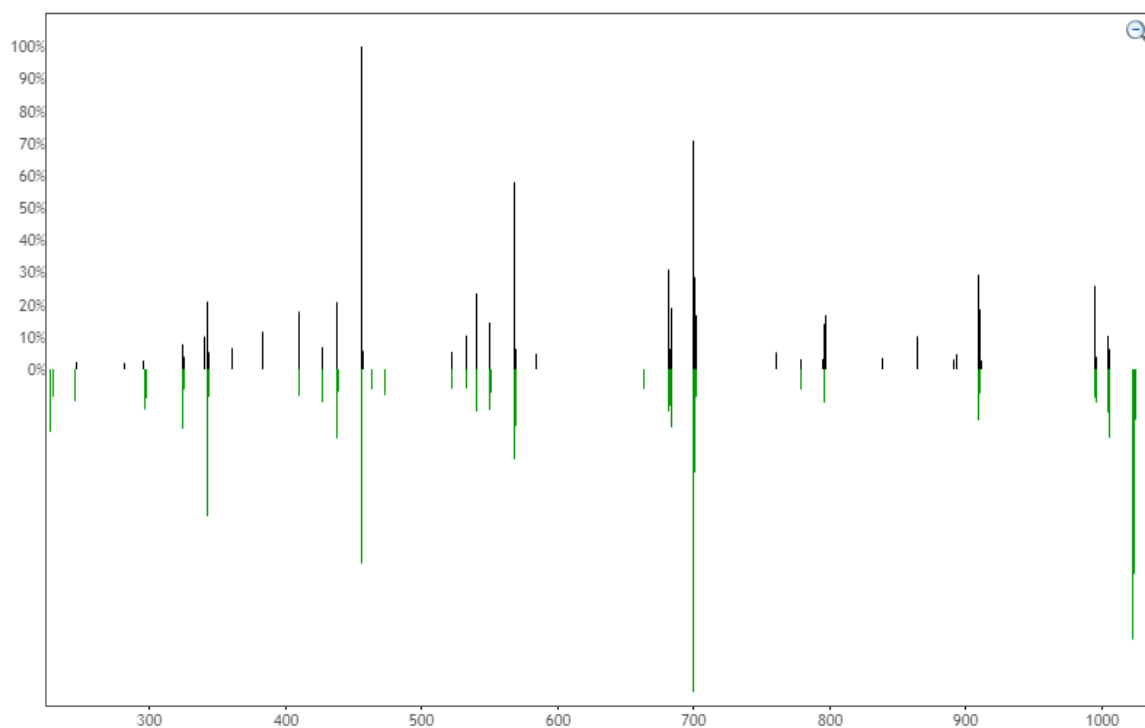

**Supplementary Figure S6.** MS/MS mirror plot of crude extract of *Paenibacillus sp.* s102b against GNPS database showing the presence of surfactin [19]. Source: Green: Surfactin MS/MS spectrum from GNPS database, black: Crude extract of *Paenibacillus sp.* s102b.

## References

1. Casida, L.E. Interaction of *Agromyces ramosus* with Other Bacteria in Soil. *Applied And Environmental Microbiology* 1983, 46, 881–888.
2. Korp, J.; Vela Gurovic, M.S.; Nett, M. Antibiotics from predatory bacteria. *Beilstein journal of organic chemistry* 2016, 12, 594–607.
3. Jurkevitch, E.; Jacquet, S. *Bdellovibrio* and related organisms Unusual bacterial predators! *M S-Medecine Sciences* 2017, 33, 519–527.
4. Kandel, P.P.; Pasternak, Z.; van Rijn, J.; Nahum, O.; Jurkevitch, E. Abundance, diversity and seasonal dynamics of predatory bacteria in aquaculture zero discharge systems. *FEMS microbiology ecology* 2014, 89, 149–161.
5. Guerrero, R.; Pedrosalio, C.; Esteve, I.; Mas, J.; Chase, D.; Margulis, L. Predatory prokaryotes - predation and primary consumption evolved in bacteria. *Proceedings of the National Academy of Sciences of the United States of America* 1986, 83, 2138–2142.
6. Willems, A.; Fernández-López, M.; Muñoz-Adelantado, E.; Goris, J.; Vos, P. de; Martínez-Romero, E.; Toro, N.; Gillis, M. Description of new *Ensifer* strains from nodules and proposal to transfer *Ensifer adhaerens* Casida 1982 to *Sinorhizobium* as *Sinorhizobium adhaerens* comb. nov. Request for an opinion. *International Journal Of Systematic And Evolutionary Microbiology* 2003, 53, 1207–1217.
7. Seccareccia, I.; Kovacs, A.T.; Gallegos-Monterrosa, R.; Nett, M. Unraveling the predator-prey relationship of *Cupriavidus necator* and *Bacillus subtilis*. *Microbiological Research* 2016, 192, 231–238.
8. Seccareccia, I.; Kost, C.; Nett, M. Quantitative Analysis of *Lysobacter* Predation. *Applied And Environmental Microbiology* 2015, 81, 7098–7105.
9. Lewin, R.A. *Saprospira grandis*: A flexibacterium that can catch bacterial prey by "ixotrophy". *Microbial Ecology* 1997, 34, 232–236.
10. Banning, E.C.; Casciotti, K.L.; Kujawinski, E.B. Novel strains isolated from a coastal aquifer suggest a predatory role for flavobacteria. *FEMS microbiology ecology* 2010, 73, 254–270.
11. Imai, I.; Ishida, Y.; Hata, Y. Killing of marine-phytoplankton by a gliding bacterium *Cytophaga* sp, isolated from the coastal sea of Japan. *Marine Biology* 1993, 116, 527–532.
12. Srisukchayakul, P.; Suwanachart, C.; Sangnoi, Y.; Kanjana-Opas, A.; Hosoya, S.; Yokota, A.; Arunpairojana, V. *Rapidithrix thailandica* gen. nov., sp nov., a marine gliding bacterium isolated from samples collected from the Andaman sea, along the southern coastline of Thailand. *International Journal Of Systematic And Evolutionary Microbiology* 2007, 57, 2275–2279.
13. Yoon, J.; Oku, N.; Park, S.; Kasai, H.; Yokota, A. *Porifericola rhodea* gen. nov., sp nov., a new member of the phylum Bacteroidetes isolated by the bait-streaked agar technique. *Antonie Van Leeuwenhoek International Journal Of General And Molecular Microbiology* 2011, 100, 145–153.
14. Dashiff, A.; Junka, R.A.; Libera, M.; Kadouri, D.E. Predation of human pathogens by the predatory bacteria *Micavibrio aeruginosavorus* and *Bdellovibrio bacteriovorus*. *Journal of applied microbiology* 2011, 110, 431–444.
15. Oku, N.; Adachi, K.; Matsuda, S.; Kasai, H.; Takatsuki, A.; Shizuri, Y. Ariakemicins a and b, novel polyketide-peptide antibiotics from a marine gliding bacterium of the genus *Rapidithrix*. *Organic Letters* 2008, 10, 2481–2484.

16. Blin, K.; Wolf, T.; Chevrette, M.G.; Lu, X.; Schwalen, C.J.; Kautsar, S.A.; Suarez Duran, H.G.; Los Santos, E.L.C. de; Kim, H.U.; Nave, M.; et al. antiSMASH 4.0-improvements in chemistry prediction and gene cluster boundary identification. *Nucleic acids research* 2017.
17. Zmijewski, M.J.; Millerhatch, K.; Goebel, M. Naphthyridinomycin, a DNA-reactive antibiotic. *Antimicrobial agents and chemotherapy* 1982, 21, 787–793.
18. Rosenbrook, W. The structure of resistomycin. *The Journal of organic chemistry* 1967, 32, 2924–2925.
19. Wang, M.; Carver, J.J.; Phelan, V.V.; Sanchez, L.M.; Garg, N.; Peng, Y.; Nguyen, D.D.; Watrous, J.; Kapon, C.A.; Luzzatto-Knaan, T.; et al. Sharing and community curation of mass spectrometry data with Global Natural Products Social Molecular Networking. *Nature Biotechnology* 2016, 34, 828–837.

## References

1. Casida, L.E. Interaction of *Agromyces ramosus* with Other Bacteria in Soil. *APPLIED AND ENVIRONMENTAL MICROBIOLOGY* **1983**, 46, 881–888.
2. Korp, J.; Vela Gurovic, M.S.; Nett, M. Antibiotics from predatory bacteria. *Beilstein journal of organic chemistry* **2016**, 12, 594–607.
3. Jurkevitch, E.; Jacquet, S. *Bdellovibrio* and related organisms Unusual bacterial predators! *M S-MEDICINE SCIENCES* **2017**, 33, 519–527.
4. Kandel, P.P.; Pasternak, Z.; van Rijn, J.; Nahum, O.; Jurkevitch, E. Abundance, diversity and seasonal dynamics of predatory bacteria in aquaculture zero discharge systems. *FEMS microbiology ecology* **2014**, 89, 149–161.
5. GUERRERO, R.; PEDROSALIO, C.; ESTEVE, I.; MAS, J.; CHASE, D.; MARGULIS, L. PREDATORY PROKARYOTES - PREDATION AND PRIMARY CONSUMPTION EVOLVED IN BACTERIA. *Proceedings of the National Academy of Sciences of the United States of America* **1986**, 83, 2138–2142.
6. Willems, A.; Fernández-López, M.; Muñoz-Adelantado, E.; Goris, J.; Vos, P. de; Martínez-Romero, E.; Toro, N.; Gillis, M. Description of new *Ensifer* strains from nodules and proposal to transfer *Ensifer adhaerens* Casida 1982 to *Sinorhizobium* as *Sinorhizobium adhaerens* comb. nov. Request for an opinion. *INTERNATIONAL JOURNAL OF SYSTEMATIC AND EVOLUTIONARY MICROBIOLOGY* **2003**, 53, 1207–1217.
7. Seccareccia, I.; Kovacs, A.T.; Gallegos-Monterrosa, R.; Nett, M. Unraveling the predator-prey relationship of *Cupriavidus necator* and *Bacillus subtilis*. *MICROBIOLOGICAL RESEARCH* **2016**, 192, 231–238.
8. Seccareccia, I.; Kost, C.; Nett, M. Quantitative Analysis of *Lysobacter* Predation. *APPLIED AND ENVIRONMENTAL MICROBIOLOGY* **2015**, 81, 7098–7105.
9. Lewin, R.A. *Saprosira grandis*: A flexibacterium that can catch bacterial prey by "ixotrophy". *MICROBIAL ECOLOGY* **1997**, 34, 232–236.
10. Banning, E.C.; Casciotti, K.L.; Kujawinski, E.B. Novel strains isolated from a coastal aquifer suggest a predatory role for flavobacteria. *FEMS microbiology ecology* **2010**, 73, 254–270.
11. IMAI, I.; ISHIDA, Y.; HATA, Y. KILLING OF MARINE-PHYTOPLANKTON BY A GLIDING BACTERIUM CYTOPHAGA SP, ISOLATED FROM THE COASTAL SEA OF JAPAN. *MARINE BIOLOGY* **1993**, 116, 527–532.

12. Srisukchayakul, P.; Suwanachart, C.; Sangnoi, Y.; Kanjana-Opas, A.; Hosoya, S.; Yokota, A.; Arunpairojana, V. *Rapidithrix thailandica* gen. nov., sp nov., a marine gliding bacterium isolated from samples collected from the Andaman sea, along the southern coastline of Thailand. *INTERNATIONAL JOURNAL OF SYSTEMATIC AND EVOLUTIONARY MICROBIOLOGY* **2007**, *57*, 2275–2279.
13. Yoon, J.; Oku, N.; Park, S.; Kasai, H.; Yokota, A. *Porifericola rhodea* gen. nov., sp nov., a new member of the phylum Bacteroidetes isolated by the bait-streaked agar technique. *ANTONIE VAN LEEUWENHOEK INTERNATIONAL JOURNAL OF GENERAL AND MOLECULAR MICROBIOLOGY* **2011**, *100*, 145–153.
14. Dashiff, A.; Junka, R.A.; Libera, M.; Kadouri, D.E. Predation of human pathogens by the predatory bacteria *Micavibrio aeruginosavorus* and *Bdellovibrio bacteriovorus*. *Journal of applied microbiology* **2011**, *110*, 431–444.
15. Oku, N.; Adachi, K.; Matsuda, S.; Kasai, H.; Takatsuki, A.; Shizuri, Y. Ariakemicins a and b, novel polyketide-peptide antibiotics from a marine gliding bacterium of the genus *Rapidithrix*. *ORGANIC LETTERS* **2008**, *10*, 2481–2484.
16. Blin, K.; Wolf, T.; Chevrette, M.G.; Lu, X.; Schwalen, C.J.; Kautsar, S.A.; Suarez Duran, H.G.; Los Santos, E.L.C. de; Kim, H.U.; Nave, M.; *et al.* antiSMASH 4.0-improvements in chemistry prediction and gene cluster boundary identification. *Nucleic acids research* **2017**.
17. ZMIJEWSKI, M.J.; MILLERHATCH, K.; GOEBEL, M. NAPHTHYRIDINOMYCIN, A DNA-REACTIVE ANTIBIOTIC. *Antimicrobial agents and chemotherapy* **1982**, *21*, 787–793.
18. Rosenbrook, W. The structure of resistomycin. *The Journal of organic chemistry* **1967**, *32*, 2924–2925.
19. Wang, M.; Carver, J.J.; Phelan, V.V.; Sanchez, L.M.; Garg, N.; Peng, Y.; Nguyen, D.D.; Watrous, J.; Kapono, C.A.; Luzzatto-Knaan, T.; *et al.* Sharing and community curation of mass spectrometry data with Global Natural Products Social Molecular Networking. *NATURE BIOTECHNOLOGY* **2016**, *34*, 828–837.
